# Supplementary material for: Lactobacillus fermentum PS150 promotes non-rapid eye movement sleep in the first night effect of mice
Source: PubMed Central journal article supplement (PMC8357945; doi:10.1038/s41598-021-95659-3), 2021-08-11
Supplement: 41598_2021_95659_MOESM1_ESM.pdf [file 41598_2021_95659_MOESM1_ESM.pdf]

***Lactobacillus fermentum* PS150 promotes non-rapid eye movement sleep in the  
first night effect of mice**

Alexander Lin<sup>a,b,‡</sup>, Ching-Ting Shih<sup>b,‡</sup>, Hsu-Feng Chu<sup>c</sup>, Chieh-Wen Chen<sup>d,e</sup>, Yu-Ting  
Cheng<sup>d,e</sup>, Chien-Chen Wu<sup>f</sup>, Cheryl C.H. Yang<sup>d,e,g,\*</sup>, and Ying-Chieh Tsai<sup>a\*</sup>

<sup>a</sup> Institute of Biochemistry and Molecular Biology, National Yang-Ming University,  
Taipei, Taiwan

<sup>b</sup> Chung Mei Biopharma Co., Ltd., Taichung, Taiwan

<sup>c</sup> Biomedical Industry Ph.D. Program, National Yang-Ming University, Taipei,  
Taiwan

<sup>d</sup> Institute of Brain Science, National Yang-Ming University, Taipei, Taiwan

<sup>e</sup> Sleep Research Center, National Yang-Ming University, Taipei, Taiwan

<sup>f</sup> Bened Biomedical Co., Ltd., Taipei, Taiwan

<sup>g</sup> Brain Research Center, National Yang-Ming University, Taipei, Taiwan

<sup>‡</sup> These authors contributed equally to this study and were listed according to  
alphabetical order.

\* Correspondence:

Cheryl C.H. Yang, Ph.D., Institute of Brain Science, National Yang-Ming  
University, No. 155, Section 2, Linong Street, Beitou District, Taipei 11221, Taiwan  
Tel: +886-2-2826-7058

E-mail: cchyang@ym.edu.tw

Ying-Chieh Tsai, Ph.D., Institute of Biochemistry and Molecular Biology, National  
Yang-Ming University, 155, Section 2, Linong Street, Beitou District, Taipei 11221,  
Taiwan

Tel: +886-2-2826-7125

E-mail: [tsaiyc@ym.edu.tw](mailto:tsaiyc@ym.edu.tw)

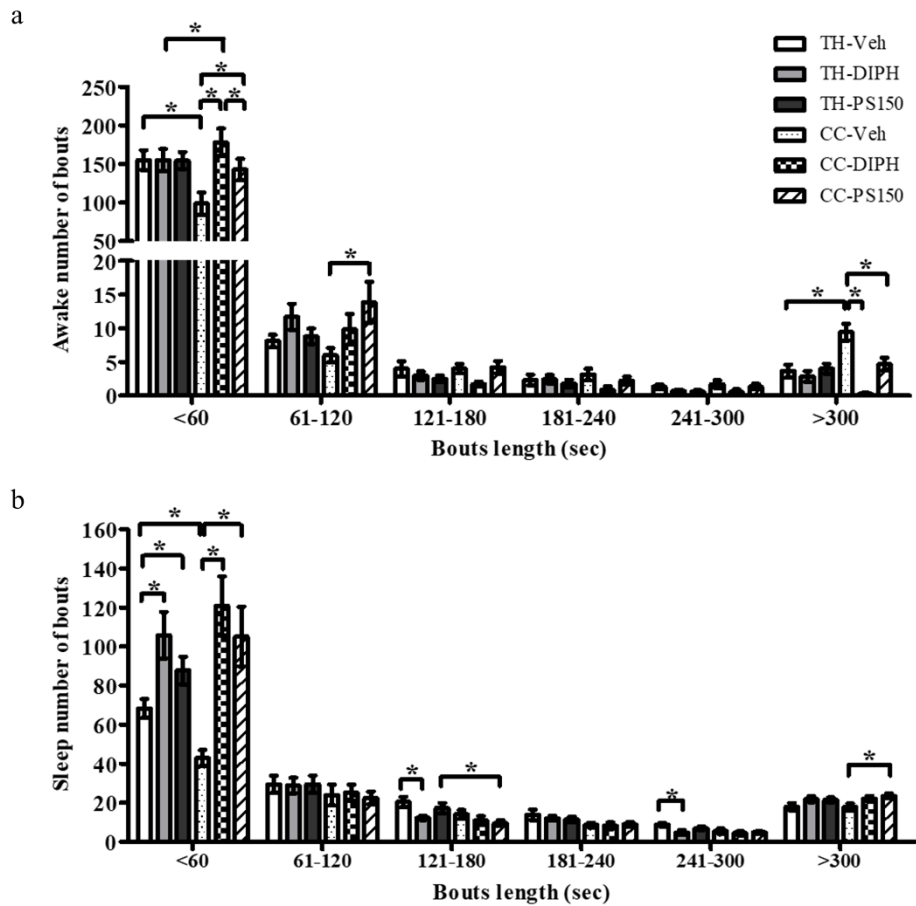

**Figure S1. Distribution of wake and sleep bouts during the light phase.** The length of bouts from each group in the light phase was calculated and categorized into six groups: <60, 61-120, 121-180, 181-240, 241-300, and >300 seconds. (a) Distribution of wake bouts. (b) Distribution of sleep bouts. Data are expressed as the mean  $\pm$  SEM ( $n = 7-9$ ) and were analyzed by two-way ANOVA with Bonferroni correction (\*  $p < 0.05$ ).

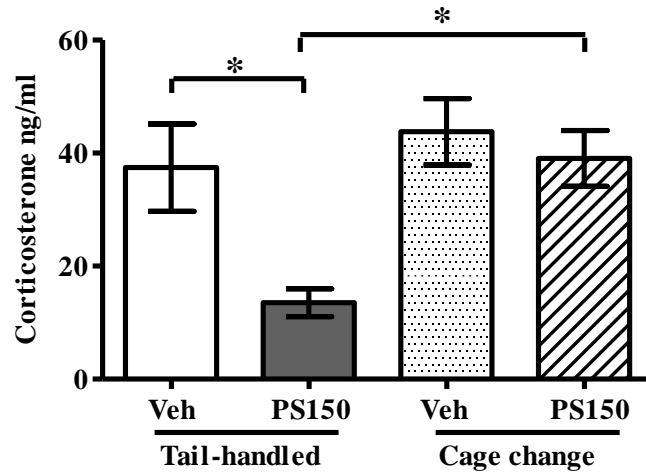

**Figure S2. Changes in serum corticosterone levels after PS150 administration in mice.** Mice were orally administered vehicle (phosphate-buffered saline) or PS150<sup>TM</sup> ( $10^9$  CFU/day) on day 15, and the cage change procedure was repeated before sampling. Serum concentrations of corticosterone are expressed as the mean  $\pm$  SEM ( $n = 7$ ) and were analyzed by one-way ANOVA followed by Tukey's post hoc test. \*  $p < 0.05$ , compared to each group.

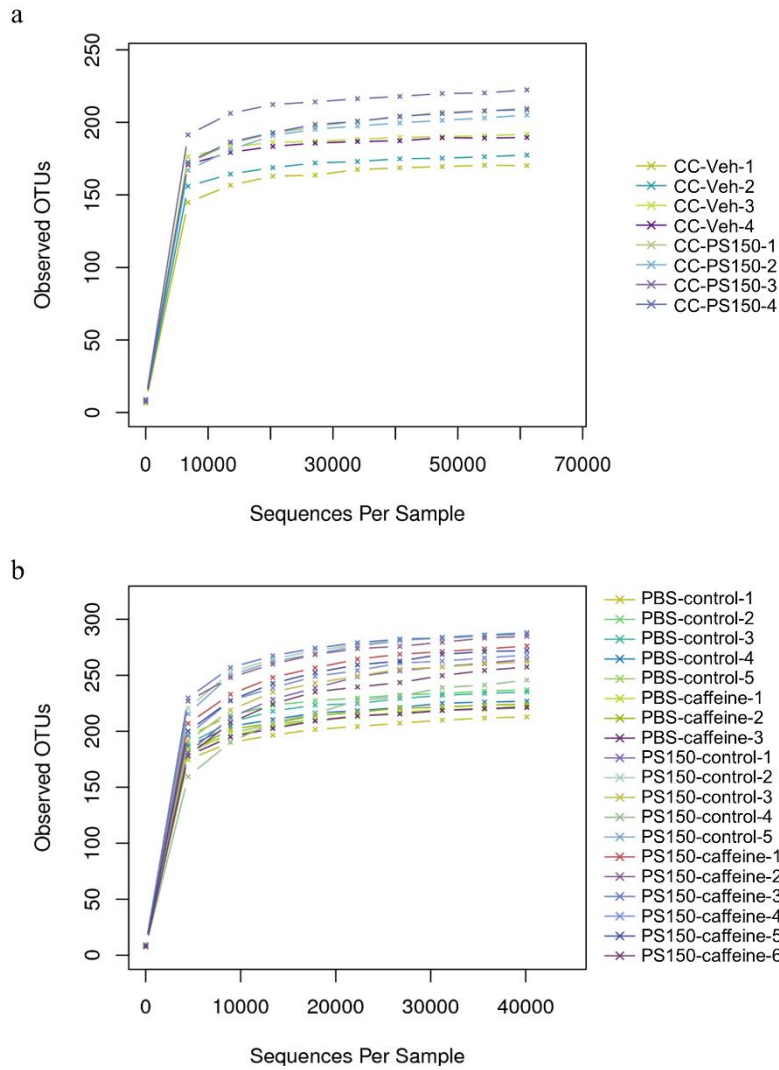

**Figure S3. Rarefaction curve of the determined operational taxonomic unit (OTU) number.** (a) Rarefaction curve of the determined OTU number from this study. (b) Rarefaction curve of the determined OTU number from the pentobarbital-induced sleep model<sup>1</sup>.

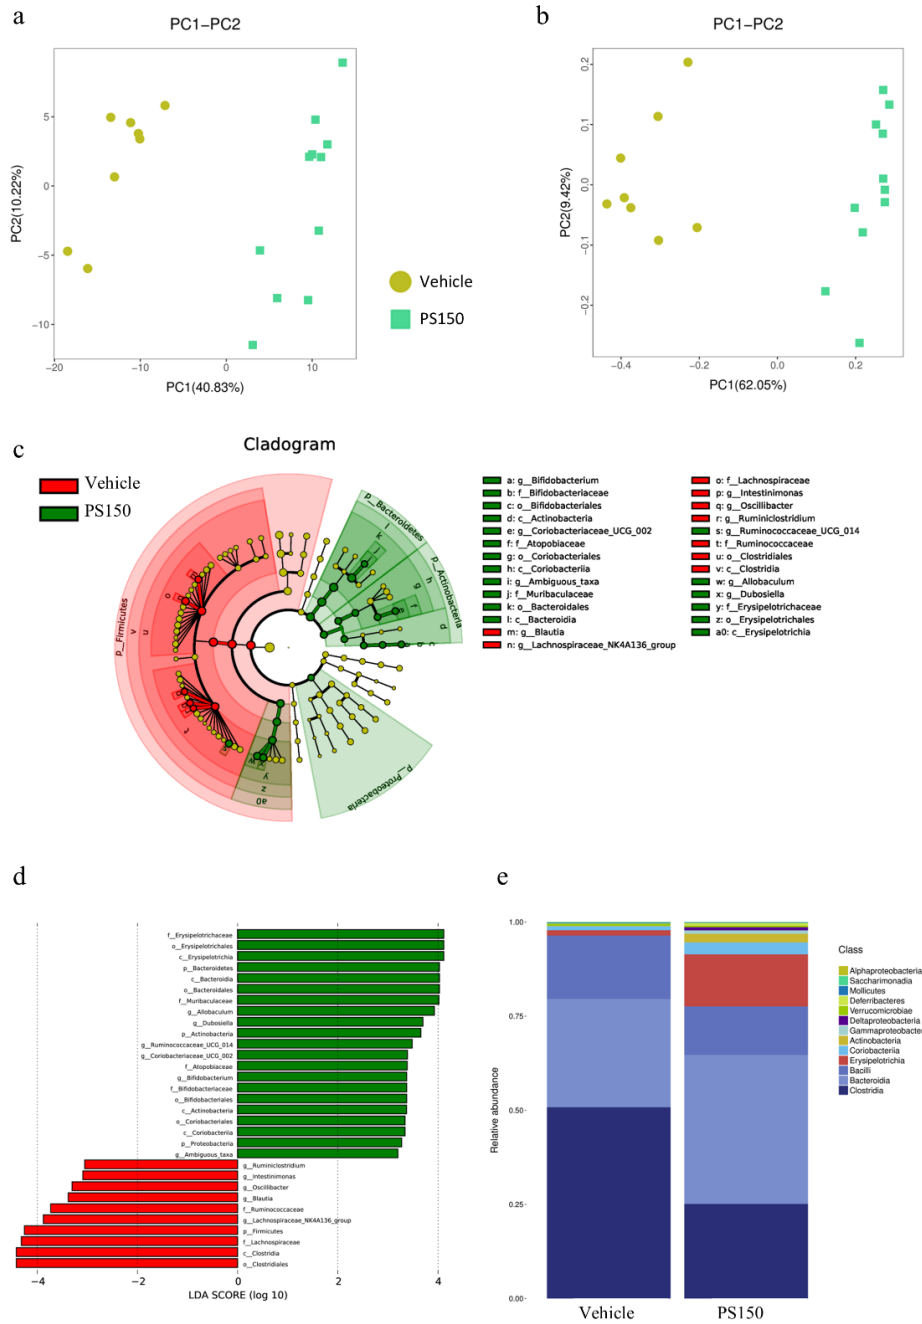

**Figure S4. Differential microbiota composition of fecal specimens from naïve mice treated with PS150™ for 4 weeks.** (a) Principal component analysis (PCA) and (b) principal coordinates analysis (PCoA) plot of fecal microbiota. (c) Cladogram from linear discriminant analysis effect size (LEfSE) analysis. Enriched taxa in either the vehicle control or PS150 group are colored red and green, respectively. (d) LDA score from LEfSE analysis. (e) Stacked plot of relative microbial distribution at the class level.

**Table S1.** Quantitative real-time polymerase chain reaction (qRT-PCR) analysis of mRNA expression in the basal forebrain and hypothalamus.

|                     | Basal forebrain |       |             |       | Hypothalamus |       |             |       |
|---------------------|-----------------|-------|-------------|-------|--------------|-------|-------------|-------|
|                     | Tail-handled    |       | Cage change |       | Tail-handled |       | Cage change |       |
|                     | Veh             | PS150 | Veh         | PS150 | Veh          | PS150 | Veh         | PS150 |
| A <sub>1</sub> R    | 1.00±           | 1.08± | 1.00±       | 1.11± | 1.00±        | 1.37± | 1.07±       | 1.31± |
|                     | 0.11            | 0.30  | 0.22        | 0.24  | 0.14         | 0.40* | 0.33        | 0.23  |
| A <sub>2A</sub> R   | 1.00±           | 0.97± | 0.77±       | 0.85± | 1.00±        | 1.20± | 1.18±       | 1.46± |
|                     | 0.27            | 0.21  | 0.31        | 0.30  | 0.41         | 0.83  | 0.65        | 0.91  |
| NT5e                | 1.00±           | 1.13± | 0.86±       | 0.99± | 1.00±        | 1.04± | 0.98±       | 1.08± |
|                     | 0.22            | 0.29  | 0.18        | 0.21  | 0.21         | 0.30  | 0.33        | 0.29  |
| Hist <sub>1</sub> R | 1.00±           | 1.09± | 0.84±       | 0.97± | 1.00±        | 1.35± | 1.07±       | 1.34± |
|                     | 0.16            | 0.33  | 0.30        | 0.26  | 0.35         | 0.48  | 0.63        | 0.39  |

Gene expression was analyzed in the basal forebrain and hypothalamus of mice. Data are expressed as the mean ± SEM ( $n = 7-8$ ) and were analyzed by one-way ANOVA with Tukey's post hoc test; \*  $p < 0.05$ , compared to the Veh group; A<sub>1</sub>R, adenosine A<sub>1</sub> receptor; A<sub>2A</sub>R, adenosine A<sub>2A</sub> receptor; Hist<sub>1</sub>R, histamine <sub>1</sub> receptor; NT5e, ecto-5'-nucleotidase.

**Table S2. Summary of data quality.**

| Model                       | Group         | PE reads*    | Q30(%)*  | Clean reads <sup>#</sup> | Average <sup>#</sup> length (bp) | GC (%) <sup>#</sup> | Source     |
|-----------------------------|---------------|--------------|----------|--------------------------|----------------------------------|---------------------|------------|
| The first-night effect      | PS150 (n=4)   | 106715±14156 | 82.2±0.6 | 85595±12292              | 458±2                            | 54.7±0.2            | This study |
|                             | PBS (n=4)     | 112168±9090  | 80.8±1.1 | 92267±7088               | 458±3                            | 54.7±0.2            |            |
| Pentobarbital induced sleep | PS150 (n=11)  | 97218±16860  | 81.3±0.7 | 81830±12788              | 459±2                            | 54.5±0.3            | 1          |
|                             | Control (n=8) | 99620±16904  | 82.5±0.7 | 77948±14539              | 455±4                            | 54.4±0.3            |            |

The mean value and standard deviation of the jointed raw data (\*) and trimmed data (#) are listed.



**Table S3. Top altered genera discovered using Metastats analysis.**

| Model                        | Genus                         | PS150 <sup>TM</sup> * (%) | Control* (%) | P-value | Q value | Source     |
|------------------------------|-------------------------------|---------------------------|--------------|---------|---------|------------|
| Pentobarbital induced sleep  | Lachnospiraceae NK4A136 group | 3.73±1.00                 | 11.33±1.56   | <0.001  | <0.05   |            |
|                              | <i>Allobaculum</i>            | 7.90±1.15                 | ND           | <0.001  | <0.05   |            |
|                              | <i>Dubosiella</i>             | 4.72±2.00                 | ND           | <0.001  | <0.05   |            |
|                              | Unclassified Ruminococcaceae  | 0.65±0.13                 | 3.4±0.38     | <0.001  | <0.05   |            |
|                              | Coriobacteriaceae UCG-002     | 2.30±0.23                 | ND           | <0.001  | <0.05   | 1          |
|                              | <i>Bifidobacterium</i>        | 2.27±0.32                 | 0.03±0.03    | <0.001  | <0.05   |            |
|                              | <i>Oscillibacter</i>          | 0.30±0.09                 | 2.15±0.21    | <0.001  | <0.05   |            |
| The first-night effect       | <i>Ruminiclostridium</i>      | 0.13±0.04                 | 1.17±0.16    | <0.001  | <0.05   |            |
|                              | <i>Intestinimonas</i>         | 0.08±0.03                 | 1.22±0.24    | <0.001  | <0.05   |            |
|                              | <i>Enterorhabdus</i>          | 0.08±0.01                 | 1.22±0.16    | <0.001  | <0.001  |            |
|                              | <i>Allobaculum</i>            | 8.94±1.39                 | ND           | 0.002   | 0.28    |            |
|                              | <i>Marvinbryantia</i>         | 0.01±0.00                 | 1.13±0.18    | 0.003   | 0.37    |            |
|                              | <i>Desulfovibrio</i>          | 1.18±0.24                 | ND           | 0.006   | 0.51    |            |
|                              | Ruminococcaceae UCG-014       | 3.47±0.51                 | 0.78±0.29    | 0.007   | 0.52    | This study |
|                              | Coriobacteriaceae UCG-002     | 2.33±0.54                 | ND           | 0.009   | 0.53    |            |
|                              | <i>Faecalibaculum</i>         | 1.28±0.43                 | ND           | 0.024   | 1       |            |
|                              | <i>Bifidobacterium</i>        | 3.78±1.30                 | ND           | 0.028   | 1       |            |
| Unclassified Muribaculaceae  | 44.66±2.03                    | 56.27±3.57                | 0.029        | 1       |         |            |
| Unclassified Ruminococcaceae | 0.44±0.11                     | 1.12±0.22                 | 0.032        | 1       |         |            |

Relative abundance of microbiota composition at the genus level (\*). Taxa with relative amounts less than 0.01% were labeled ND.

**Table S4. Risk of bias in this study was evaluated using SYRCLE's risk of bias tool.**

| Item | Type        | Domain                      | Risk    | Descriptions                                                                       |
|------|-------------|-----------------------------|---------|------------------------------------------------------------------------------------|
| 1    | Selection   | Sequence generation         | Unclear | Animals were randomly assigned to each group manually.                             |
| 2    | Selection   | Baseline characteristics    | Low     | Baselines were confirmed insignificant between groups before treatment.            |
| 3    | Selection   | Allocation concealment      | High    | The grouping was assigned by investigators.                                        |
| 4    | Performance | Random housing              | Low     | Mice were individually housed in cages and randomly placed within the animal room. |
| 5    | Performance | Blinding                    | High    | The investigators were not blinded in this study.                                  |
| 6    | Detection   | Random outcome assessment   | High    | Animals were picked according to designated sequence during outcome assessment.    |
| 7    | Detection   | Blinding                    | High    | The investigators were not blinded in this study.                                  |
| 8    | Attrition   | Incomplete outcome data     | Low     | Data were only removed due to technical failure.                                   |
| 9    | Reporting   | Selective outcome reporting | Low     | All outcomes were reported.                                                        |
| 10   | Other       | Other sources of bias       | Low     | The sponsor had no role in the analysis and interpretation of data.                |

**Table S5.** Primers used in this study.

|                       | Sequence (5'→3')            | Size<br>(bp) | Accession<br>number |
|-----------------------|-----------------------------|--------------|---------------------|
| A <sub>1</sub> R-F    | AGAACCACCTCCACCCTTCT        | 227          | XM_006529079.2      |
| A <sub>1</sub> R-R    | TACTCTGGGTGGTGGTCACA        |              |                     |
| A <sub>2A</sub> R-F   | AACCTGCAGAACGTCAC           | 245          | XM_006513093.3      |
| A <sub>2A</sub> R-R   | GTCACCAAGCCATTGTACCG        |              |                     |
| Hist <sub>1</sub> R-F | GACAAGATGTGTGAGGGGAA        | 285          | XM_006505616.3      |
| Hist <sub>1</sub> R-R | CCATAGAGAGCCAAAAGAGG        |              |                     |
| NT5e-F                | TTACTAAAGCATGACTCTGGTGATCAA | 84           | NM_011851.4         |
| NT5e-R                | AACGGCTGGGTAAACTACTTTCATT   |              |                     |
| GAPDH-F               | CAATGTGTCCGTCGTGGATCT       | 208          | XM_017321385.1      |
| GAPDH-R               | GTCCTCAGTGTAGCCCAAGATG      |              |                     |

A<sub>1</sub>R, adenosine A<sub>1</sub> receptor; A<sub>2A</sub>R, adenosine A<sub>2A</sub> receptor; Hist<sub>1</sub>R, histamine <sub>1</sub> receptor; NT5e, 5' nucleotidase-ecto (the enzyme converts adenosine monophosphate to adenosine); GAPDH, glyceraldehyde 3-phosphate dehydrogenase

## **SUPPLEMENTARY REFERENCES**

- 1 Lin, A. *et al.* Hypnotic Effects of *Lactobacillus fermentum* PS150™ on Pentobarbital-Induced Sleep in Mice. *Nutrients* **11**, doi:10.3390/nu11102409 (2019).
